# Supplementary material
Source: PubMed Central journal article supplement (PMC6325231)
Supplement: 95d6f4d7c0a71f0b9464379b37b6ba36_AAC.01676-18-s0001.pdf [file 95d6f4d7c0a71f0b9464379b37b6ba36_AAC.01676-18-s0001.pdf]

## Supplementary data

**Table S1. Bacterial strains and plasmids used in the study.**

| Strains or plasmid      | Description                                                                                                                                                                 | Source or reference |
|-------------------------|-----------------------------------------------------------------------------------------------------------------------------------------------------------------------------|---------------------|
| <b>Strains</b>          |                                                                                                                                                                             |                     |
| A2265                   | Wild-type clinical <i>A. baumannii</i> isolate carrying single copy of <i>bla</i> <sub>OXA-23</sub> without <i>bla</i> <sub>TEM-1</sub> or <i>ISAbal-bla</i> <sub>ADC</sub> | This study          |
| <b>Plasmids</b>         |                                                                                                                                                                             |                     |
| pACBSR-Hyg              | Template for amplification of the hygromycin resistance cassette                                                                                                            | (1)                 |
| pMo130-Tel <sup>R</sup> | Suicide plasmid used in the gene deletion experiment, xylE <sup>+</sup> , sacB <sup>+</sup> , Km <sup>R</sup>                                                               | (2)                 |
| pMo130-Hyg <sup>R</sup> | pMo130-Tel <sup>R</sup> plasmid containing 1.25 Kb hygromycin resistance cassette from pACBSR-Hyg, instead of Tel resistance cassette                                       | This study          |
| pYMAb2                  | <i>E. coli</i> - <i>A. baumannii</i> shuttle plasmid, Km <sup>R</sup>                                                                                                       | (3)                 |
| pYMAb2-Hyg <sup>R</sup> | pYMAb2 plasmid containing 1.25Kb hygromycin resistance cassette from pACBSR-Hyg                                                                                             | This study          |

## Reference

1. Huang TW, Lam I, Chang HY, Tsai SF, Palsson BO, Charusanti P. 2014. Capsule deletion via a lambda-Red knockout system perturbs biofilm formation and

- fimbriae expression in *Klebsiella pneumoniae* MGH 78578. BMC Res Notes 7:13.
2. Amin IM, Richmond GE, Sen P, Koh TH, Piddock LJ, Chua KL. 2013. A method for generating marker-less gene deletions in multidrug-resistant *Acinetobacter baumannii*. BMC Microbiol 13:158.
  3. Kuo SC, Yang SP, Lee YT, Chuang HC, Chen CP, Chang CL, Chen TL, Lu PL, Hsueh PR, Fung CP. 2013. Dissemination of imipenem-resistant *Acinetobacter baumannii* with new plasmid-borne *bla*<sub>(OXA-72)</sub> in Taiwan. BMC Infect Dis 13:319.

**Table S2. Primers in the study.**

| Primer name                           | Primer sequence (5'-3')                                            |
|---------------------------------------|--------------------------------------------------------------------|
| $\Delta$ 2265-OXA-UP-F                | 5'cggccgcctgcagcggatccTCTGGTTGTACGGTTCAGCATAA                      |
| $\Delta$ 2265-OXA-UP-R                | 5'atctcaatgCAACCAGCCCACCTTGTGGTT                                   |
| $\Delta$ 2265-OXA-DW-F                | 5'ggcctggtgCATTGAGATAAATGGGCCTTTTA                                 |
| $\Delta$ 2265-OXA-DW-R                | 5'agcccgctgcatgcatctagaTCCAATGAAACAGAGCAGGCA                       |
| pYMAb2-Hyg-IS-<br>oxa23-F             | 5'GTGGTGGTGGTCTCGAGTGC GGCCGCAAGCTTGTCTGACGTGCCGCCTA<br>TCAGTTCTCT |
| pYMAb2-Hyg-IS-<br>oxa23-R             | 5'TAGCATGACTGGTGGACAGCAAATGGGTCGCGGATCCCACCCGACCAAC<br>CAAAATCC    |
| <i>bla</i> <sub>OXA-23</sub> -Forward | 5'-TATTCTGTATTGCGCGG                                               |
| <i>bla</i> <sub>OXA-23</sub> -Reverse | 5'-CT ATGTGGTTGCTTCTCT                                             |
| <i>rpoB</i> -Forward                  | 5'-TCCGCACGTAAAGTAGGAAC                                            |
| <i>rpoB</i> -Reverse                  | 5'-ATGCCGCCTGAAAAAGTAAC                                            |

Note. Upstream and downstream sequences of were amplified from genomic DNA of strain A2265 using the primers ( $\Delta$ 2265-OXA-UP-F/R and  $\Delta$ 2265-OXA-UP-F/R). The recombined fragment was cloned into the pMo130-Hyg<sup>R</sup> vector. The IS*AbaI*-*bla*<sub>OXA-23</sub> gene was amplified with the pYMAb2-Hyg-IS-oxa23-F/R primers, and the PCR products were cloned into the *Bam*HI and *Sal*I sites of the *E. coli* — *A. baumannii* shuttle vector pYMAb2-Hyg<sup>R</sup>. The primers (*bla*<sub>OXA-23</sub>-Forward/Reverse and *rpoB*-Forward/Reverse) were used into the measure of copy number of *bla*<sub>OXA-</sub>
